# Supplementary material for: Parametrization of an effective correlated hamiltonian for hole transfer in large DNA strands
Source: Royal Society of Chemistry journal article supplement (doi:10.1039/b300807j), 2003-01-01
Supplement: b300807j-esi.pdf [file b300807j-esi.pdf]

**Parametrization of an effective correlated hamiltonian for hole transfer in large DNA strands***by Guillaume Brunaud, Frédéric Castet, Alain Fritsch, and Laurent Ducasse\**

\* To whom correspondence should be addressed : l.ducasse@lpcm.u-bordeaux1.fr

**Figures S1a-S1d : Dependence of the transfer integrals between first neighbour intrastrand nucleoside pairs on the RISE parameter**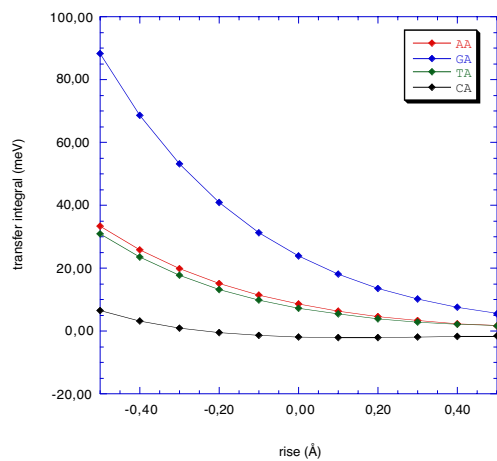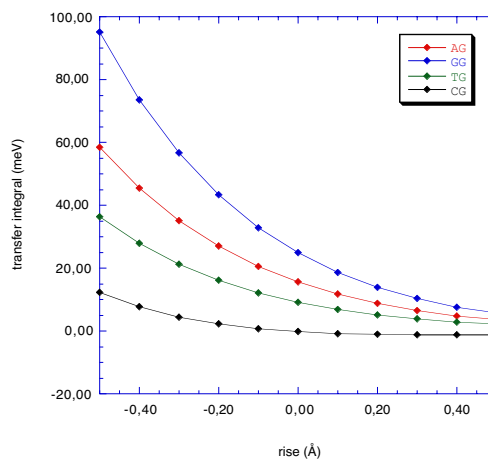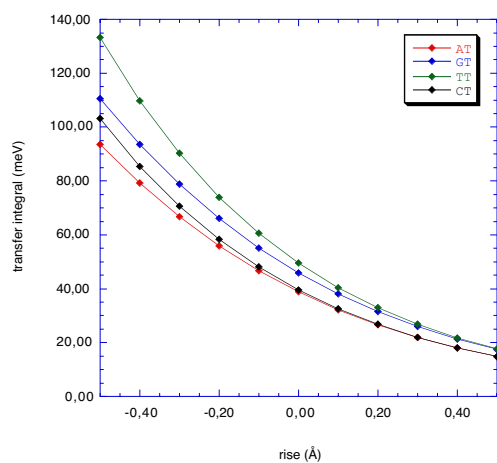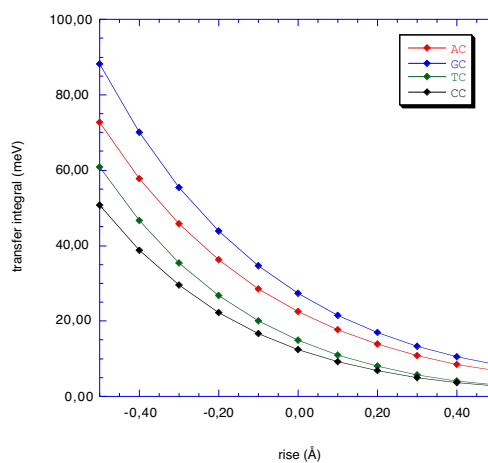

**Parametrization of an effective correlated hamiltonian for hole transfer in large DNA strands***by Guillaume Brunaud, Frédéric Castet, Alain Fritsch, and Laurent Ducasse\**

\* To whom correspondence should be addressed : l.ducasse@lpcm.u-bordeaux1.fr

**Figures S2a-S2d : Dependence of the transfer integrals between first neighbour intrastrand nucleoside pairs on the SHIFT parameter**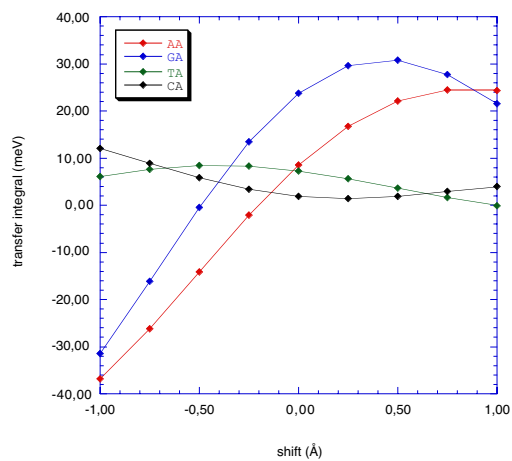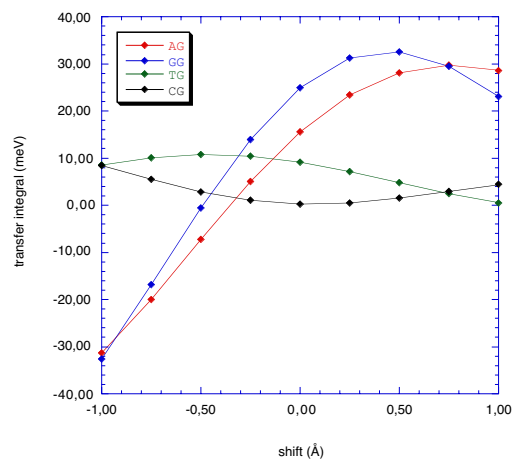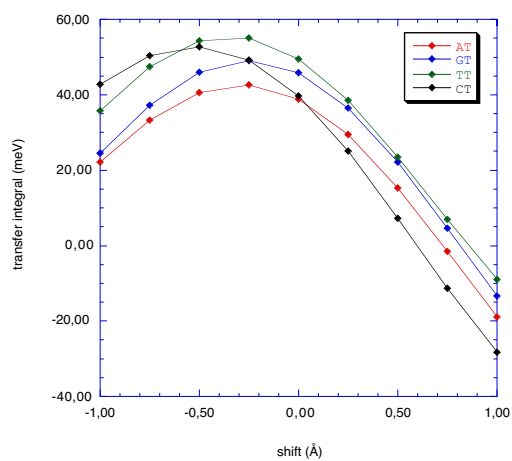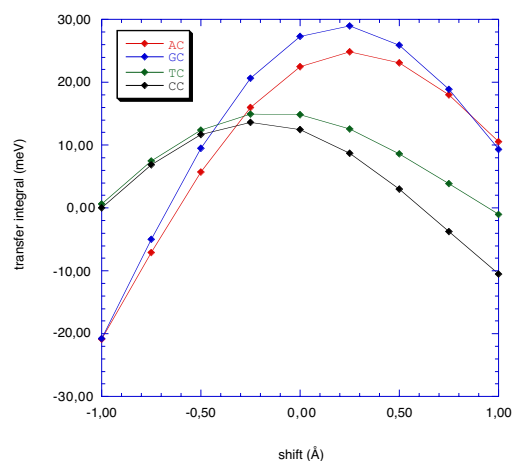

**Parametrization of an effective correlated hamiltonian for hole transfer in large DNA strands***by Guillaume Brunaud, Frédéric Castet, Alain Fritsch, and Laurent Ducasse\**

\* To whom correspondence should be addressed : l.ducasse@lpcm.u-bordeaux1.fr

**Figures S3a-S3d : Dependence of the transfer integrals between first neighbour intrastrand nucleoside pairs on the SLIDE parameter**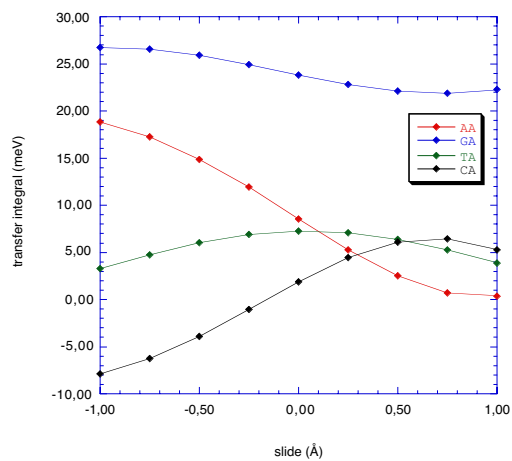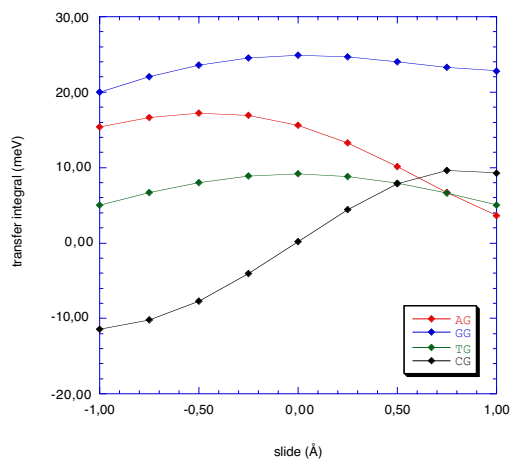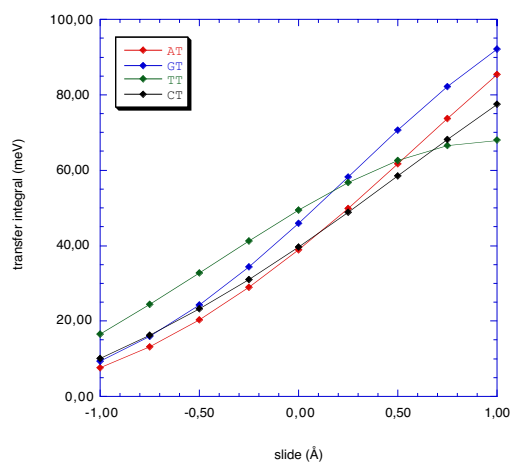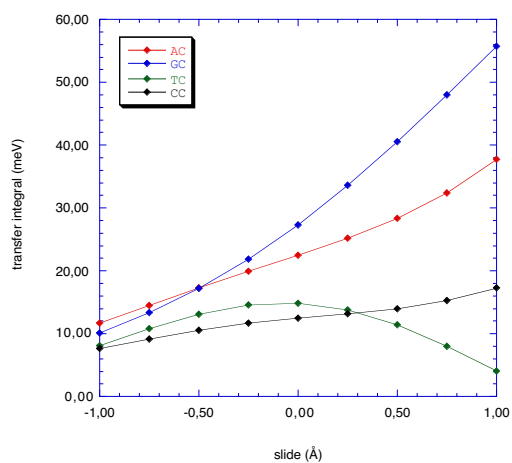

**Parametrization of an effective correlated hamiltonian for hole transfer in large DNA strands***by Guillaume Brunaud, Frédéric Castet, Alain Fritsch, and Laurent Ducasse\**

\* To whom correspondence should be addressed : l.ducasse@lpcm.u-bordeaux1.fr

**Figures S4a-S4d : Dependence of the transfer integrals between first neighbour intrastrand nucleoside pairs on the TWIST parameter**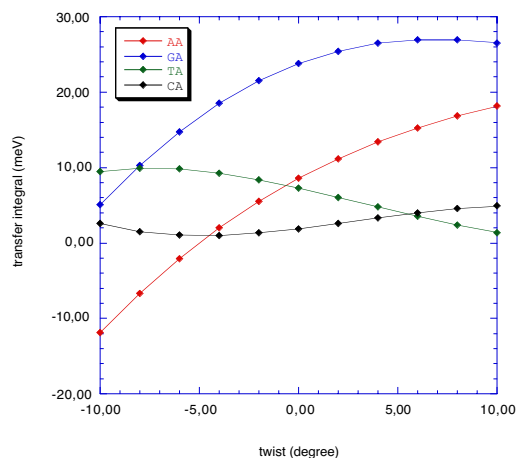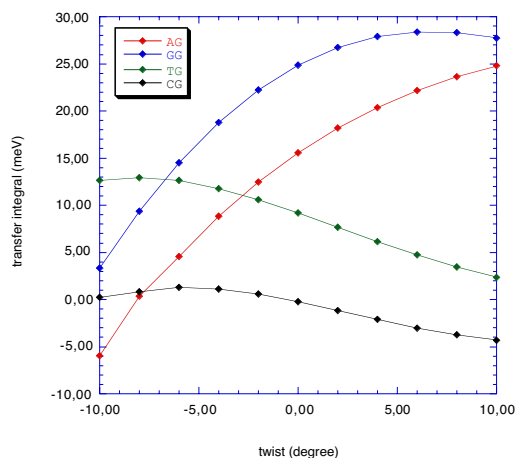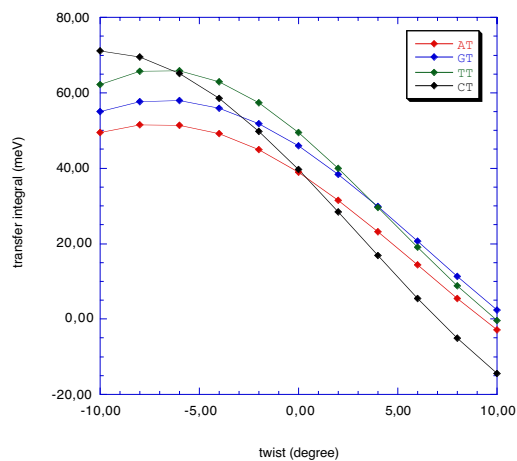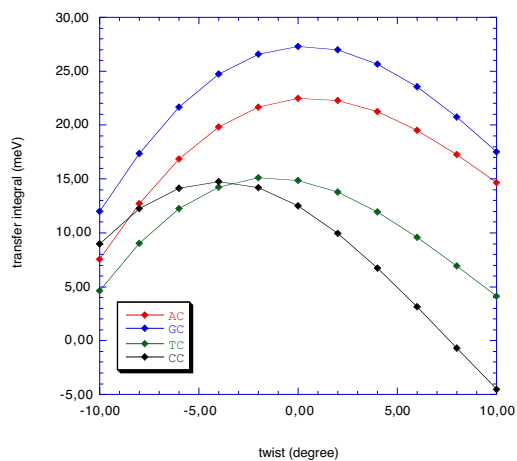

**Parametrization of an effective correlated hamiltonian for hole transfer in large DNA strands***by Guillaume Brunaud, Frédéric Castet, Alain Fritsch, and Laurent Ducasse\**

\* To whom correspondence should be addressed : l.ducasse@lpcm.u-bordeaux1.fr

**Figures S5a-S5d : Dependence of the transfer integrals between first neighbour intrastrand nucleoside pairs on the ROLL parameter**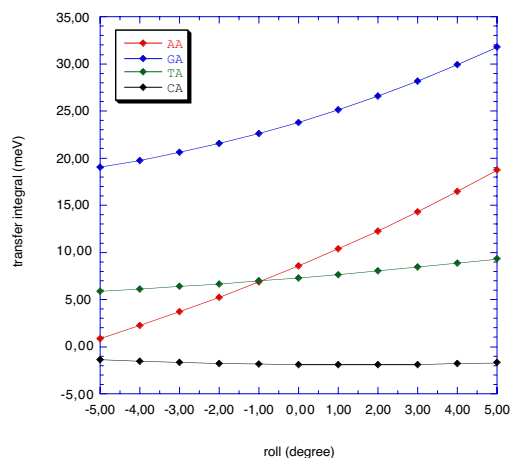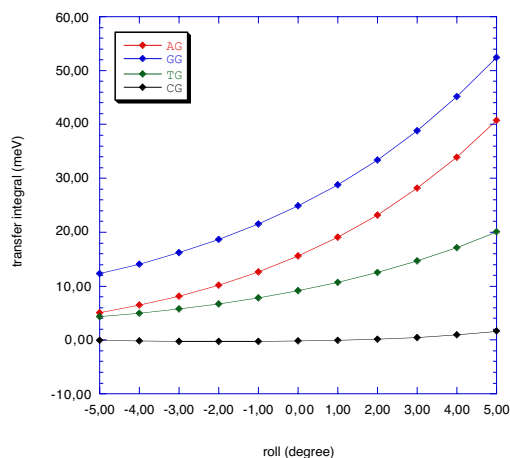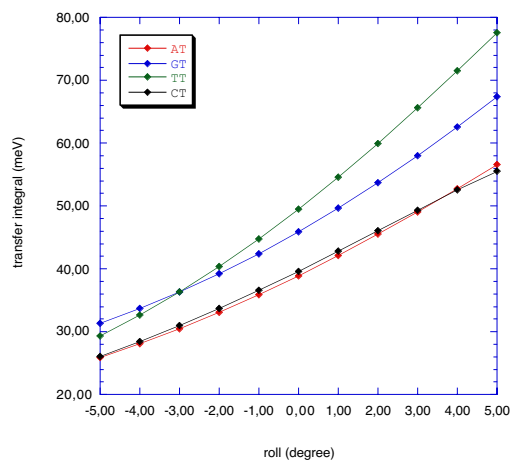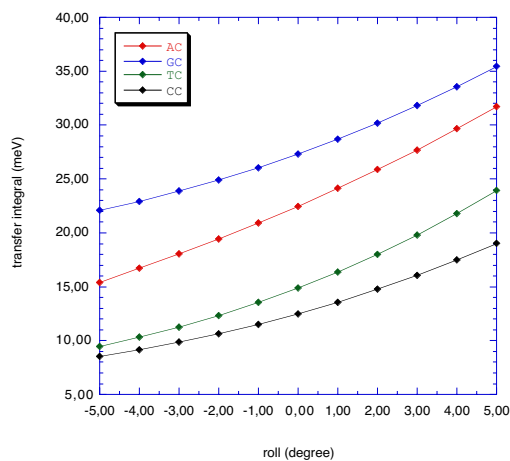

**Parametrization of an effective correlated hamiltonian for hole transfer in large DNA strands***by Guillaume Brunaud, Frédéric Castet, Alain Fritsch, and Laurent Ducasse\**

\* To whom correspondence should be addressed : l.ducasse@lpcm.u-bordeaux1.fr

**Figures S6a-S6d : Dependence of the transfer integrals between first neighbour intrastrand nucleoside pairs on the TILT parameter**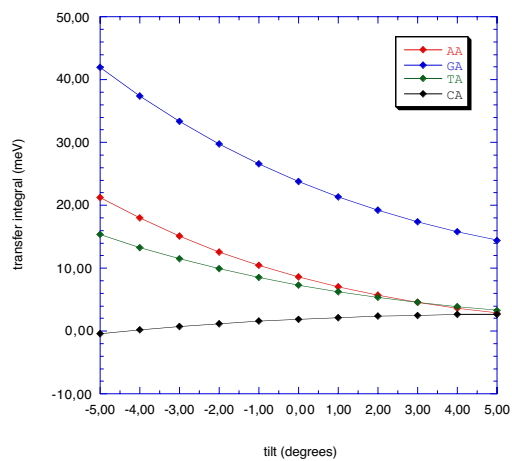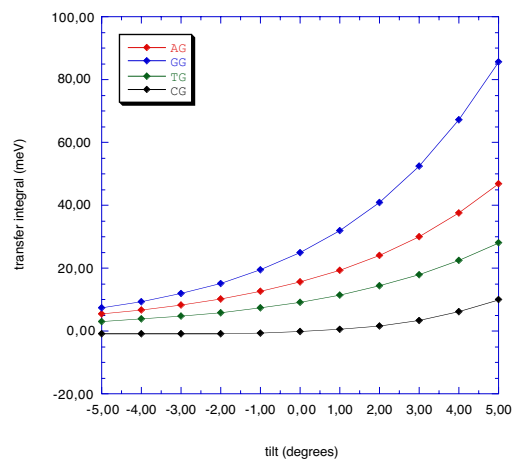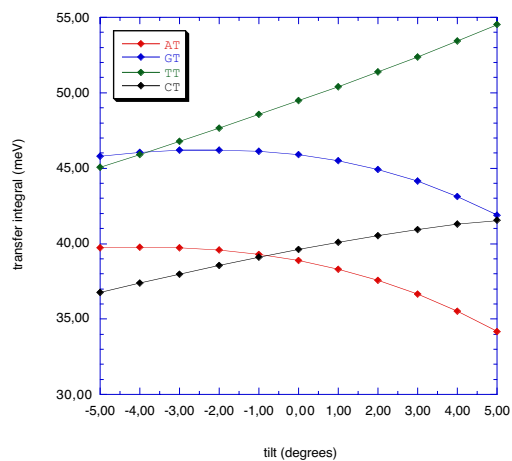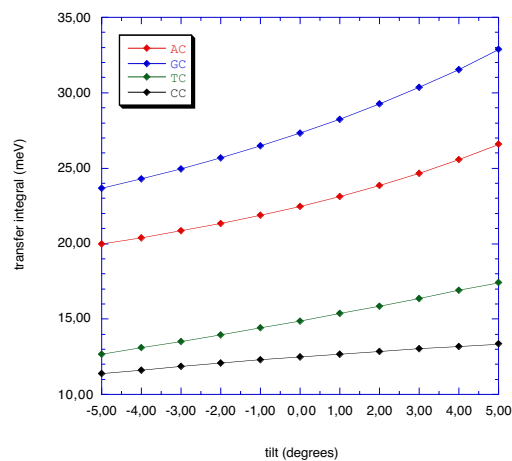

**Parametrization of an effective correlated hamiltonian for hole transfer in large DNA strands**by *Guillaume Brunaud, Frédéric Castet, Alain Fritsch, and Laurent Ducasse\**

\* To whom correspondence should be addressed : l.ducasse@lpcm.u-bordeaux1.fr

**Table S1 : Dependence of the Coulomb integrals (in eV) between first neighbour intrastrand nucleoside pairs on the translation parameters (Å).**

| XY                    | RISE        |             | SLIDE       |             | SHIFT       |             |
|-----------------------|-------------|-------------|-------------|-------------|-------------|-------------|
|                       | - 0.5       | + 0.5       | - 1.0       | + 1.0       | - 1.0       | + 1.0       |
| AA                    | 3.112       | 2.664       | 2.785       | 2.899       | 2.947       | 2.730       |
| AC                    | 3.040       | 2.627       | 2.639       | 2.955       | 2.892       | 2.692       |
| AG                    | 3.023       | 2.607       | 2.695       | 2.853       | 2.906       | 2.642       |
| AT                    | 3.028       | 2.623       | 2.614       | 2.972       | 2.827       | 2.739       |
| CA                    | 2.956       | 2.553       | 2.745       | 2.682       | 2.880       | 2.555       |
| CC                    | 3.074       | 2.637       | 2.733       | 2.875       | 2.971       | 2.660       |
| CG                    | 2.904       | 2.514       | 2.670       | 2.664       | 2.847       | 2.503       |
| CT                    | 3.155       | 2.694       | 2.763       | 2.982       | 2.976       | 2.779       |
| GA                    | 3.109       | 2.662       | 2.813       | 2.862       | 2.924       | 2.754       |
| GC                    | 3.107       | 2.670       | 2.700       | 2.987       | 2.928       | 2.764       |
| GG                    | 3.060       | 2.629       | 2.747       | 2.846       | 2.911       | 2.694       |
| GT                    | 3.089       | 2.661       | 2.666       | 3.003       | 2.862       | 2.799       |
| TA                    | 2.765       | 2.422       | 2.586       | 2.532       | 2.763       | 2.380       |
| TC                    | 2.880       | 2.501       | 2.588       | 2.704       | 2.845       | 2.475       |
| TG                    | 2.701       | 2.374       | 2.507       | 2.500       | 2.714       | 2.322       |
| TT                    | 3.004       | 2.587       | 2.653       | 2.842       | 2.898       | 2.613       |
| <b>Mean deviation</b> | <b>7.7%</b> | <b>7.1%</b> | <b>3.7%</b> | <b>2.4%</b> | <b>3.4%</b> | <b>5.6%</b> |

**Table S2 : Dependence of the Coulomb integrals (in eV) between first neighbour intrastrand nucleoside pairs on the rotation parameters (degrees).**

| XY                    | TWIST       |             | ROLL        |              | TILT        |             |
|-----------------------|-------------|-------------|-------------|--------------|-------------|-------------|
|                       | - 10.0      | 10.0        | - 0.5       | + 0.5        | - 0.5       | + 0.5       |
| AA                    | 2.926       | 2.817       | 2.840       | 2.913        | 2.943       | 2.812       |
| AC                    | 2.897       | 2.738       | 2.791       | 2.859        | 2.786       | 2.863       |
| AG                    | 2.868       | 2.734       | 2.699       | 2.918        | 2.618       | 3.014       |
| AT                    | 2.873       | 2.740       | 2.759       | 2.878        | 2.789       | 2.844       |
| CA                    | 2.811       | 2.666       | 2.710       | 2.779        | 2.818       | 2.675       |
| CC                    | 2.949       | 2.721       | 2.802       | 2.887        | 2.810       | 2.877       |
| CG                    | 2.785       | 2.602       | 2.593       | 2.811        | 2.537       | 2.880       |
| CT                    | 2.997       | 2.801       | 2.842       | 2.987        | 2.887       | 2.937       |
| GA                    | 2.909       | 2.828       | 2.842       | 2.905        | 2.945       | 2.805       |
| GC                    | 2.934       | 2.807       | 2.847       | 2.911        | 2.838       | 2.918       |
| GG                    | 2.887       | 2.770       | 2.728       | 2.943        | 2.642       | 3.048       |
| GT                    | 2.905       | 2.801       | 2.807       | 2.927        | 2.837       | 2.892       |
| TA                    | 2.668       | 2.498       | 2.555       | 2.616        | 2.648       | 2.528       |
| TC                    | 2.810       | 2.542       | 2.641       | 2.723        | 2.652       | 2.710       |
| TG                    | 2.631       | 2.425       | 2.439       | 2.625        | 2.394       | 2.680       |
| TT                    | 2.904       | 2.647       | 2.715       | 2.857        | 2.761       | 2.807       |
| <b>Mean deviation</b> | <b>2.6%</b> | <b>3.3%</b> | <b>2.2%</b> | <b>2.15%</b> | <b>2.5%</b> | <b>3.0%</b> |

**Parametrization of an effective correlated hamiltonian for hole transfer in large DNA strands**by *Guillaume Brunaud, Frédéric Castet, Alain Fritsch, and Laurent Ducasse\**

\* To whom correspondence should be addressed : l.ducasse@lpcm.u-bordeaux1.fr

**Table S3 : Dependence of the penetration integrals (in meV) between first neighbour intrastrand nucleoside pairs on the RISE parameter**

| XY | 5'-XY-3' |     |       | 3'-XY-5' |     |       |
|----|----------|-----|-------|----------|-----|-------|
|    | - 0.5    | 0.0 | + 0.5 | - 0.5    | 0.0 | + 0.5 |
| AA | 134      | 125 | 112   | 92       | 79  | 66    |
| AC | 81       | 80  | 75    | 202      | 167 | 138   |
| AG | 256      | 224 | 195   | 9        | 8   | 5     |
| AT | 98       | 92  | 84    | 44       | 38  | 31    |
| CA | 108      | 98  | 86    | 72       | 60  | 48    |
| CC | -1       | 10  | 14    | 185      | 155 | 128   |
| CG | 269      | 232 | 199   | -4       | -10 | -14   |
| CT | 69       | 62  | 55    | 16       | 10  | 5     |
| GA | 159      | 143 | 127   | 84       | 75  | 63    |
| GC | 115      | 107 | 97    | 207      | 173 | 144   |
| GG | 261      | 227 | 196   | -30      | -24 | -21   |
| GT | 108      | 99  | 89    | 36       | 31  | 25    |
| TA | 90       | 82  | 73    | 51       | 43  | 35    |
| TC | -34      | -20 | -11   | 123      | 106 | 90    |
| TG | 274      | 236 | 203   | 8        | 3   | -2    |
| TT | 79       | 69  | 59    | -23      | -20 | -19   |

**Table S4 : Dependence of the penetration integrals (in meV) between first neighbour intrastrand nucleoside pairs on the SHIFT parameter**

| XY | 5'-XY-3' |     |       | 3'-XY-5' |     |       |
|----|----------|-----|-------|----------|-----|-------|
|    | - 1.0    | 0.0 | + 1.0 | - 1.0    | 0.0 | + 1.0 |
| AA | 156      | 125 | 94    | 64       | 79  | 92    |
| AC | 151      | 80  | 17    | 114      | 167 | 205   |
| AG | 192      | 224 | 243   | 47       | 8   | -34   |
| AT | 99       | 92  | 88    | 12       | 38  | 60    |
| CA | 129      | 98  | 73    | 38       | 60  | 73    |
| CC | 75       | 10  | -36   | 103      | 155 | 193   |
| CG | 229      | 232 | 226   | 9        | -10 | -35   |
| CT | 79       | 62  | 50    | -24      | 10  | 39    |
| GA | 168      | 143 | 115   | 62       | 75  | 86    |
| GC | 167      | 107 | 50    | 124      | 173 | 208   |
| GG | 200      | 227 | 238   | 6        | -24 | -54   |
| GT | 109      | 99  | 88    | 2        | 31  | 59    |
| TA | 110      | 82  | 60    | 20       | 43  | 61    |
| TC | 33       | -20 | -54   | 53       | 106 | 156   |
| TG | 243      | 236 | 220   | 14       | 3   | -17   |
| TT | 86       | 69  | 52    | -51      | -20 | 10    |



**Parametrization of an effective correlated hamiltonian for hole transfer in large DNA strands**by *Guillaume Brunaud, Frédéric Castet, Alain Fritsch, and Laurent Ducasse\**

\* To whom correspondence should be addressed : l.ducasse@lpcm.u-bordeaux1.fr

**Table S5 : Dependence of the penetration integrals (in meV) between first neighbour intrastrand nucleoside pairs on the SLIDE parameter**

| XY | 5'-XY-3' |     |       | 3'-XY-5' |     |       |
|----|----------|-----|-------|----------|-----|-------|
|    | - 0.5    | 0.0 | + 0.5 | - 0.5    | 0.0 | + 0.5 |
| AA | 109      | 125 | 134   | 57       | 79  | 92    |
| AC | 80       | 80  | 76    | 153      | 167 | 165   |
| AG | 200      | 224 | 235   | -13      | 8   | 28    |
| AT | 106      | 92  | 75    | 11       | 38  | 61    |
| CA | 93       | 98  | 90    | 20       | 60  | 91    |
| CC | 23       | 10  | -7    | 109      | 155 | 185   |
| CG | 232      | 232 | 211   | -42      | -10 | 14    |
| CT | 86       | 62  | 30    | -24      | 10  | 41    |
| GA | 121      | 143 | 157   | 51       | 75  | 91    |
| GC | 104      | 107 | 105   | 153      | 173 | 178   |
| GG | 198      | 227 | 240   | -44      | -24 | -5    |
| GT | 113      | 99  | 85    | 9        | 31  | 49    |
| TA | 78       | 82  | 74    | -7       | 43  | 83    |
| TC | -6       | -20 | -36   | 58       | 106 | 143   |
| TG | 239      | 236 | 214   | -47      | 3   | 44    |
| TT | 92       | 69  | 34    | -62      | -20 | 19    |

**Table S6 : Dependence of the penetration integrals (in meV) between first neighbour intrastrand nucleoside pairs on the TWIST parameter**

| XY | 5'-XY-3' |     |         | 3'-XY-5' |     |        |
|----|----------|-----|---------|----------|-----|--------|
|    | - 10.0°  | 0.0 | + 10.0° | - 10.0°  | 0.0 | +10.0° |
| AA | 132      | 125 | 115     | 67       | 79  | 91     |
| AC | 100      | 80  | 62      | 140      | 167 | 191    |
| AG | 216      | 224 | 228     | 23       | 8   | -7     |
| AT | 87       | 92  | 99      | 23       | 38  | 53     |
| CA | 110      | 98  | 86      | 44       | 60  | 70     |
| CC | 36       | 10  | -9      | 117      | 155 | 183    |
| CG | 224      | 232 | 237     | 9        | -10 | -32    |
| CT | 55       | 62  | 72      | -14      | 10  | 31     |
| GA | 149      | 143 | 134     | 64       | 75  | 87     |
| GC | 126      | 107 | 89      | 147      | 173 | 197    |
| GG | 210      | 227 | 237     | -10      | -24 | -34    |
| GT | 92       | 99  | 108     | 14       | 31  | 51     |
| TA | 94       | 82  | 70      | 37       | 43  | 49     |
| TC | -1       | -20 | -32     | 72       | 106 | 137    |
| TG | 231      | 236 | 238     | 30       | 3   | -24    |
| TT | 57       | 69  | 79      | -34      | -20 | -3     |

**Parametrization of an effective correlated hamiltonian for hole transfer in large DNA strands***by Guillaume Brunaud, Frédéric Castet, Alain Fritsch, and Laurent Ducasse\**

\* To whom correspondence should be addressed : l.ducasse@lpcm.u-bordeaux1.fr

**Table S7 : Dependence of the penetration integrals (in meV) between first neighbour intrastrand nucleoside pairs on the ROLL parameter**

| XY | 5'-XY-3' |     |       | 3'-XY-5' |     |       |
|----|----------|-----|-------|----------|-----|-------|
|    | - 5.0    | 0.0 | + 5.0 | - 5.0    | 0.0 | + 5.0 |
| AA | 131      | 125 | 118   | 78       | 79  | 81    |
| AC | 104      | 80  | 55    | 166      | 167 | 169   |
| AG | 193      | 224 | 262   | 3        | 8   | 13    |
| AT | 91       | 92  | 95    | 37       | 38  | 38    |
| CA | 104      | 98  | 93    | 59       | 60  | 60    |
| CC | 34       | 10  | -15   | 157      | 155 | 152   |
| CG | 202      | 232 | 267   | -13      | -10 | -6    |
| CT | 62       | 62  | 64    | 14       | 10  | 6     |
| GA | 149      | 143 | 138   | 70       | 75  | 79    |
| GC | 132      | 107 | 81    | 162      | 173 | 187   |
| GG | 196      | 227 | 263   | -29      | -24 | -19   |
| GT | 102      | 99  | 99    | 30       | 31  | 32    |
| TA | 87       | 82  | 77    | 43       | 43  | 41    |
| TC | 4        | -20 | -45   | 110      | 106 | 101   |
| TG | 205      | 236 | 273   | 0        | 3   | 4     |
| TT | 66       | 69  | 72    | -13      | -20 | -28   |

**Table S8 : Dependence of the penetration integrals (in meV) between first neighbour intrastrand nucleoside pairs on the TILT parameter**

| XY | 5'-XY-3' |     |       | 3'-XY-5' |     |       |
|----|----------|-----|-------|----------|-----|-------|
|    | - 5.0    | 0.0 | + 5.0 | - 5.0    | 0.0 | + 5.0 |
| AA | 132.5    | 125 | 117   | 85       | 79  | 76    |
| AC | 75       | 80  | 84    | 180      | 167 | 156   |
| AG | 196      | 224 | 255   | 10       | 8   | 8     |
| AT | 80       | 92  | 105   | 40       | 38  | 36    |
| CA | 102      | 98  | 93    | 59       | 60  | 60    |
| CC | 7        | 10  | 11    | 152      | 155 | 158   |
| CG | 196      | 232 | 272   | -10      | -10 | -9    |
| CT | 47       | 62  | 78    | 11       | 10  | 10    |
| GA | 155      | 143 | 133   | 63       | 75  | 85    |
| GC | 101      | 107 | 113   | 146      | 173 | 205   |
| GG | 200      | 227 | 255   | -20      | -24 | -33   |
| GT | 88       | 99  | 112   | 24       | 31  | 38    |
| TA | 85       | 82  | 78    | 43       | 43  | 43    |
| TC | -21      | -20 | -21   | 106      | 106 | 107   |
| TG | 199      | 236 | 279   | 2        | 3   | 3     |
| TT | 52       | 69  | 86    | -18      | -20 | -21   |
